# Supplementary material for: Chemical composition of isoprene SOA under acidic and non-acidic conditions: effect of relative humidity
Source: PubMed Central journal article supplement (PMC7063744; doi:10.5194/acp-18-18101-2018), 2018-12-20

Supplement of Atmos. Chem. Phys., 18, 18101–18121, 2018  
<https://doi.org/10.5194/acp-18-18101-2018-supplement>  
© Author(s) 2018. This work is distributed under  
the Creative Commons Attribution 4.0 License.

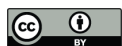

*Supplement of*

## **Chemical composition of isoprene SOA under acidic and non-acidic conditions: effect of relative humidity**

**Klara Nestorowicz et al.**

*Correspondence to:* Rafal Szmigielski ([ralf@ichf.edu.pl](mailto:ralf@ichf.edu.pl)) and Mohammed Jaoui ([jaoui.mohammed@epa.gov](mailto:jaoui.mohammed@epa.gov))

The copyright of individual parts of the supplement might differ from the CC BY 4.0 License.

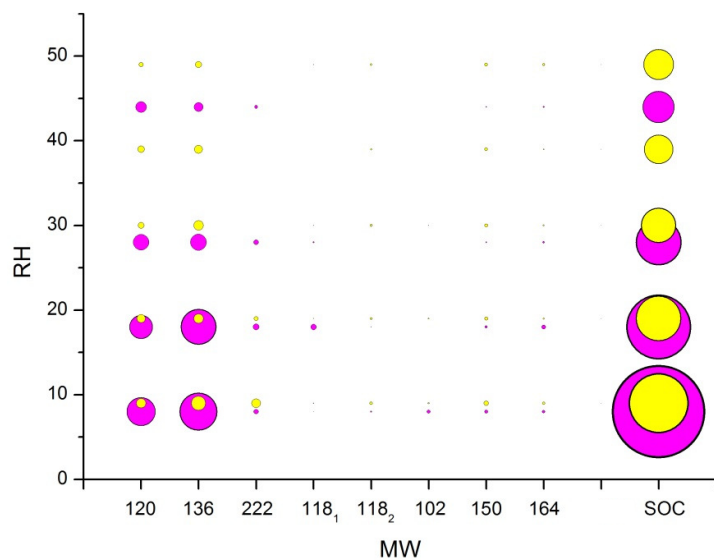

**Figure S1.** Relative amounts of aerosol components detected with GC-MS acidic seed (pink) and non-acidic seed (yellow) experiments (the areas of the circles are proportional to the estimated mass concentrations of compounds).

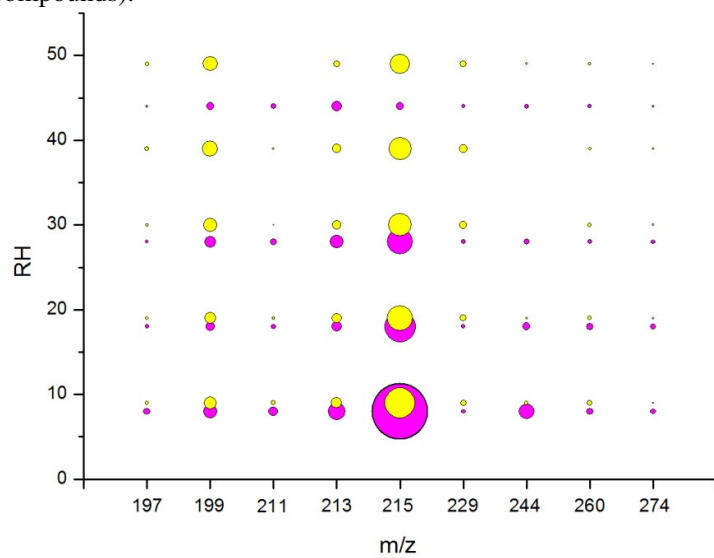

**Figure S2.** Relative abundances of aerosol components detected with LC-MS in acidic seed (pink) and non-acidic seed (yellow) experiments (the areas of the circles are proportional to relative abundances of compounds detected).

**Table S1.** Comparison of product yields in acidic seed experiments vs. non-acidic seed experiments at various RH levels ( > higher, = equal and lower < )

| Product                        | MW  | m/z | RH = 8<br>- 9 | RH = 18 -<br>20 | RH = 28<br>- 30 | RH = 39 -<br>49 |
|--------------------------------|-----|-----|---------------|-----------------|-----------------|-----------------|
| 2-methylglyceric acid          | 120 |     | >             |                 |                 |                 |
| 2-methyltetrol OS              |     | 244 | >             |                 |                 |                 |
| 2-methylthreonic acid NOS      |     | 274 | >             |                 |                 |                 |
| furanone OS                    |     | 211 | >             |                 |                 |                 |
| 2-methyltetrols                | 136 |     | >             |                 |                 | =               |
| 2-methyltetrol NOS             |     | 260 | >             |                 | =               |                 |
| furanetriol OS                 |     | 213 | >             | =               |                 |                 |
| 2-methyltetrol OS              |     | 215 | >             | =               |                 |                 |
| IEPOX-1                        | 118 |     | =             | >               | =               |                 |
| dimer of 2-methylglyceric acid | 222 |     | <             | >               |                 |                 |
| C5-diol                        | 102 |     | >             | <               | =               |                 |
| IEPOX OS                       |     | 197 | >             | =               |                 | <               |
| 2-methylglyceric acid OS       |     | 199 | =             | <               |                 |                 |
| IEPOX-2                        | 118 |     | <             |                 |                 |                 |
| 2-methylthreonic acid OS       |     | 229 | <             |                 |                 |                 |

**Figure S3.** Concentrations or relative abundances of some compounds in acidic seed experiments (blue) and non-acidic seed experiments (red) – influence of Relative Humidity

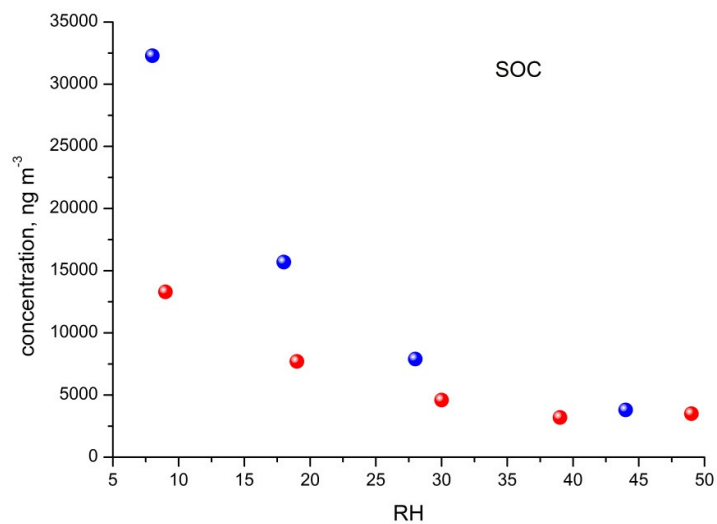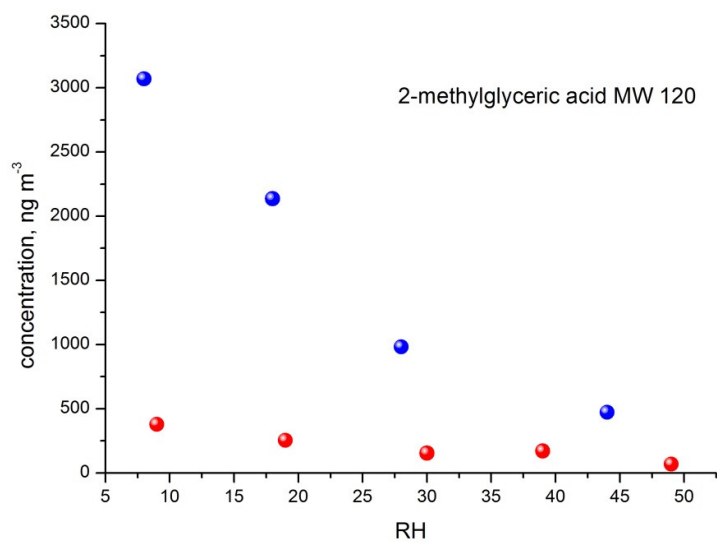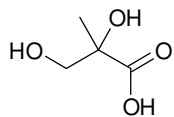

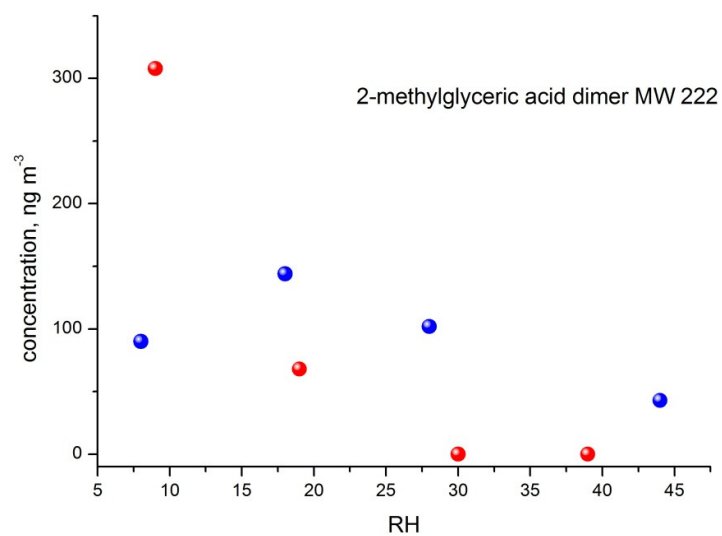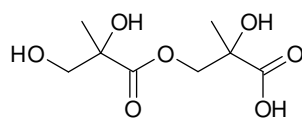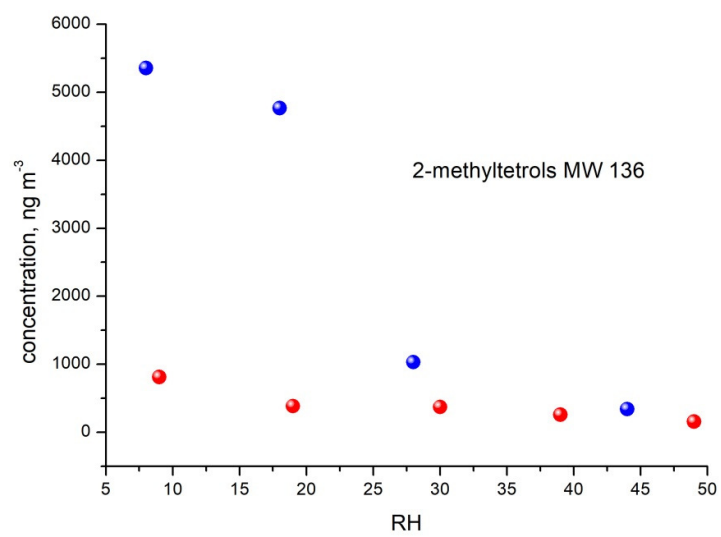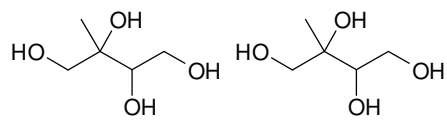

2-methylthreitol (left) and 2-methylerythritol (right)

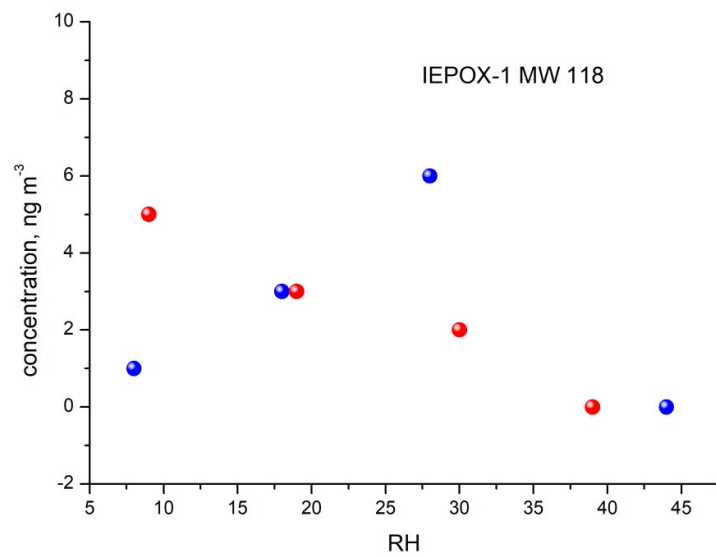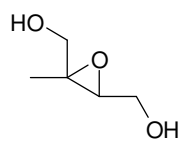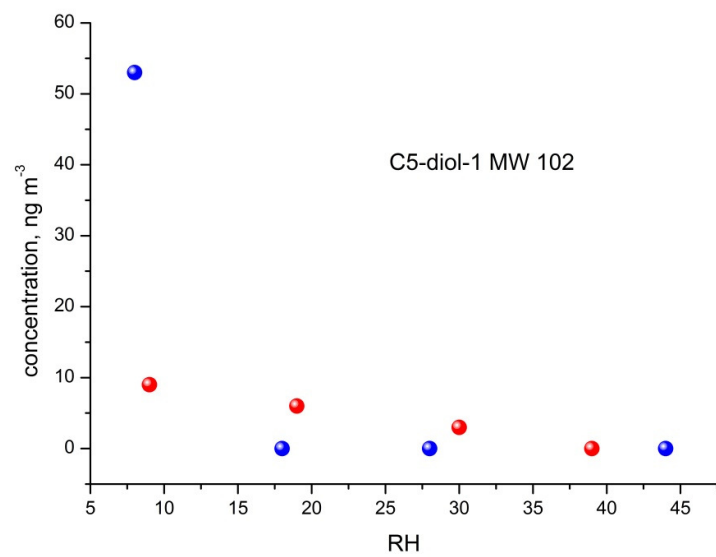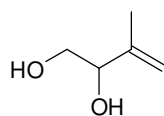

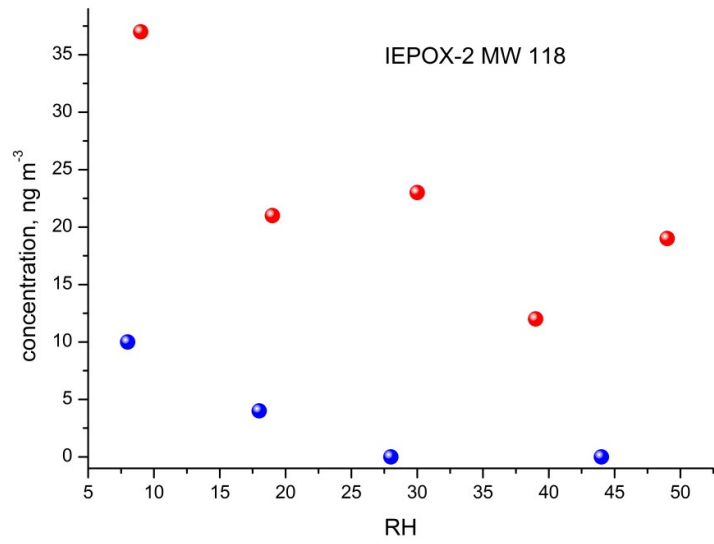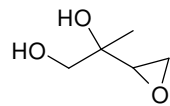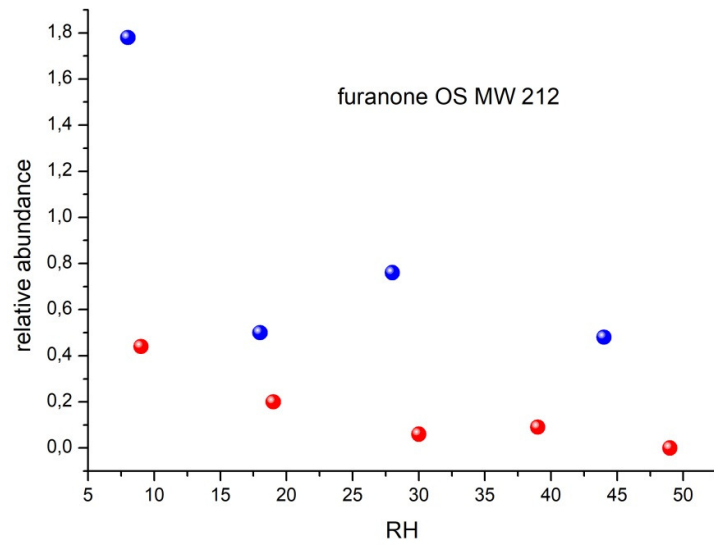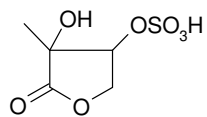

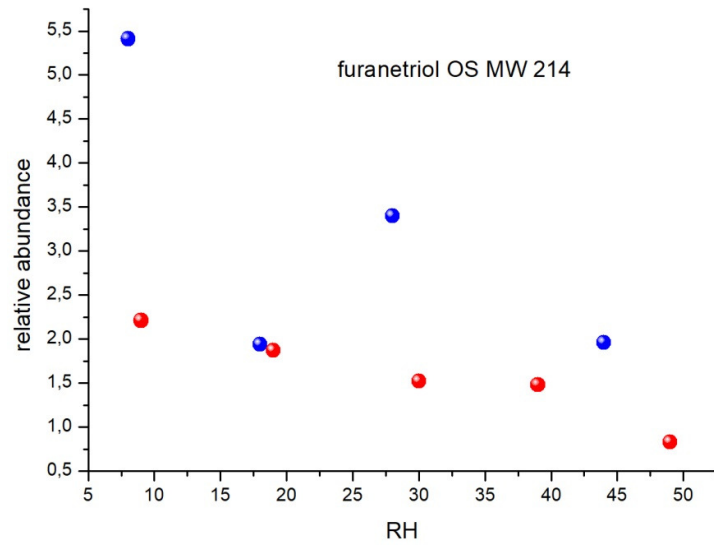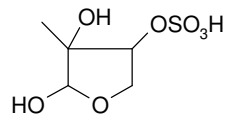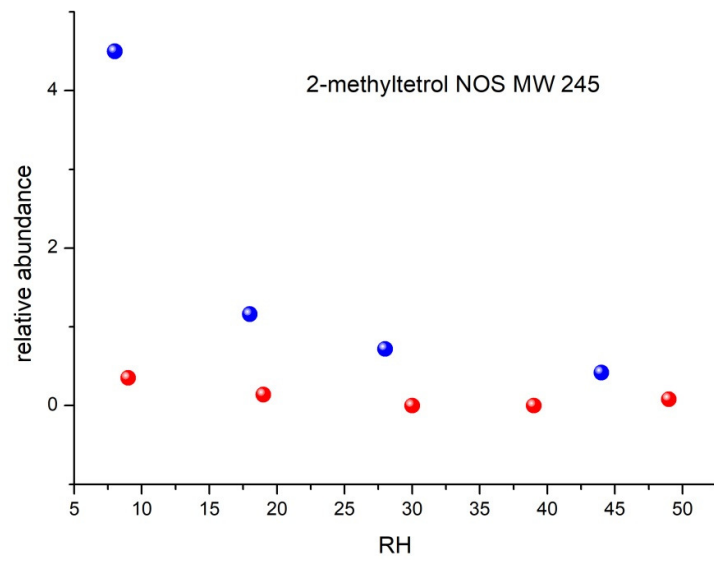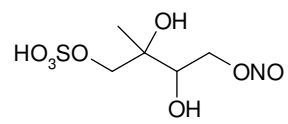



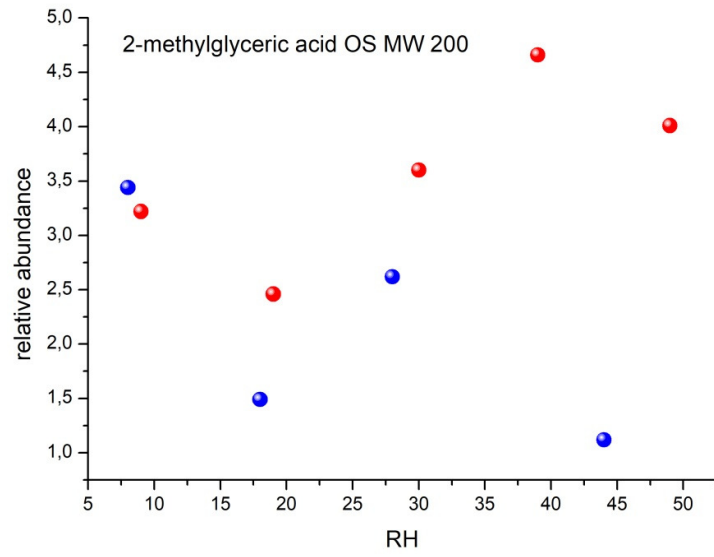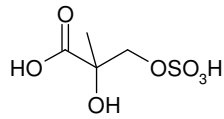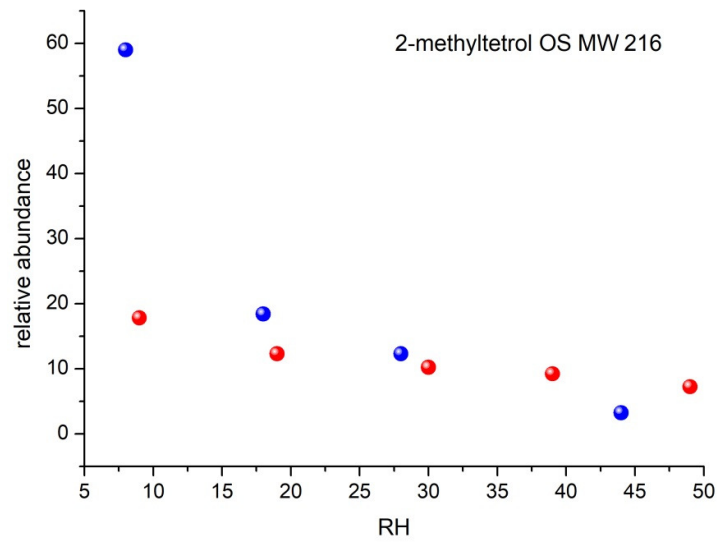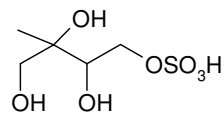

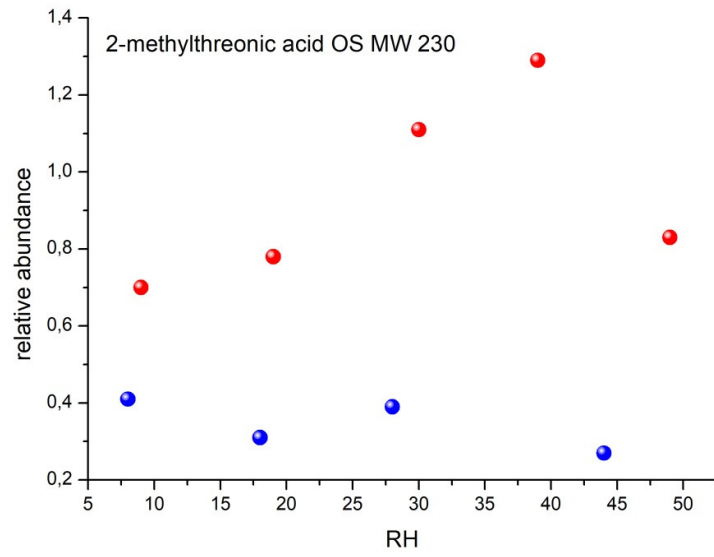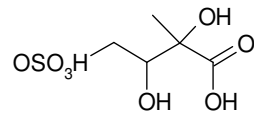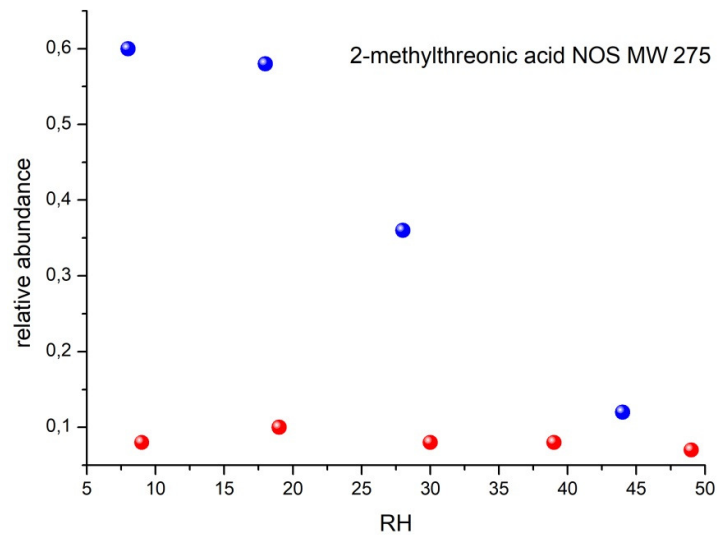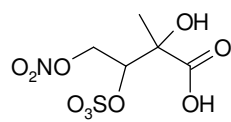

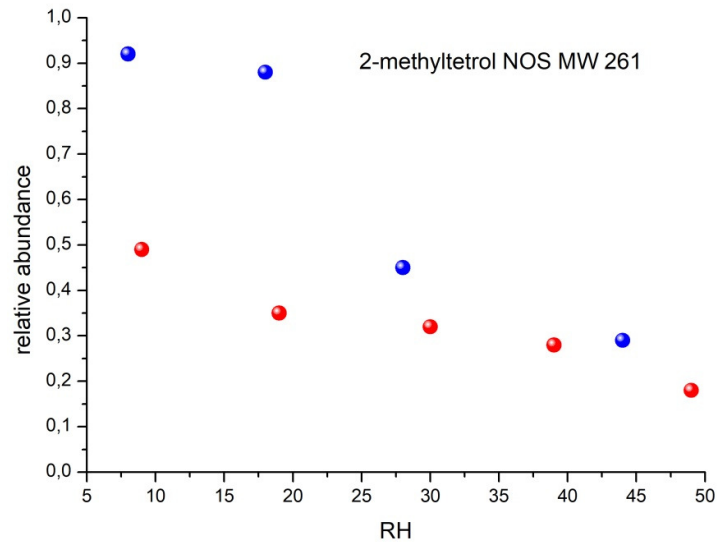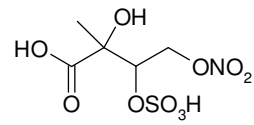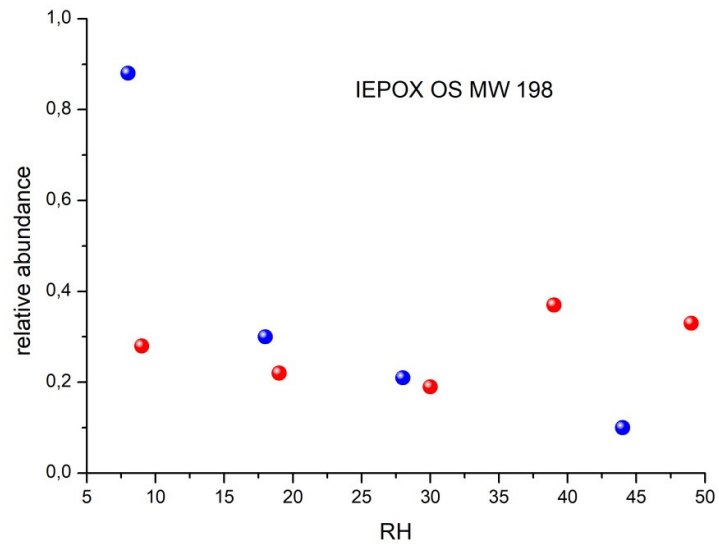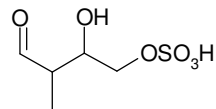

**Figure S4.** Extracted Ion Chromatograms (EIC) of selected components detected in the respective filter extracts from smog chamber ISO SOA (ER667 – non-acidic seed aerosol; ER662 – acidic seed aerosol) and PM<sub>2.5</sub> ambient summer aerosol from Godow and Zielonka sites.

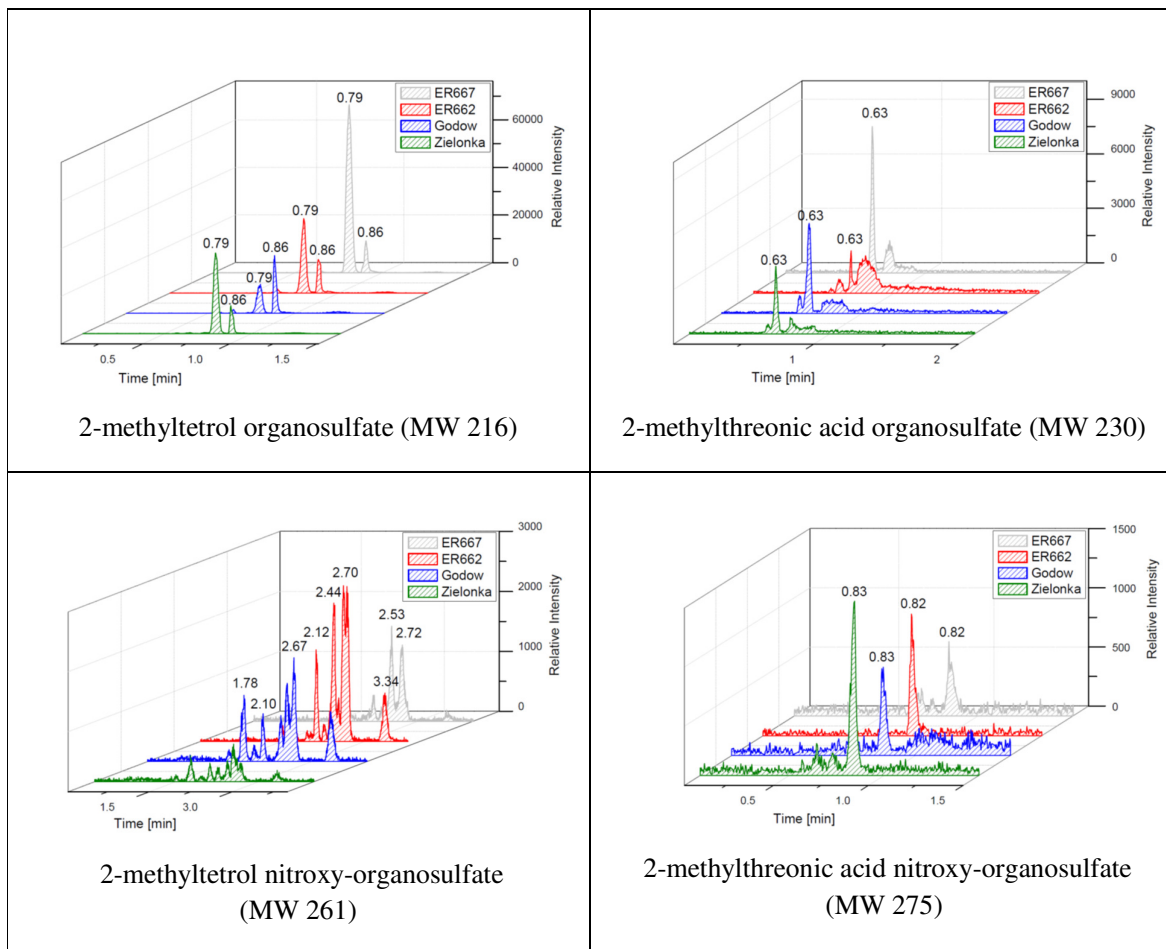

Supplement: NIHMS1045602-supplement-Supp_Info.pdf [file NIHMS1045602-supplement-Supp_Info.pdf]
